# Supplementary material for: The Basic Facts of Korean Breast Cancer in 2013: Results of a Nationwide Survey and Breast Cancer Registry Database
Source: PubMed Central journal article supplement — J Breast Cancer. 2016 Mar 25;19(1):1–7. doi: 10.4048/jbc.2016.19.1.1 (PMC4822102; doi:10.4048/jbc.2016.19.1.1), 2016-03-25
Supplement: jbc-19-1-s001.pdf [file jbc-19-1-s001.pdf]

## SUPPLEMENT

**Authors/the KBCS Consortium members include the byline authors as well as the followings:**

Sei Hyun Ahn<sup>5</sup>, Sung Gwe Ahn<sup>6</sup>, Jeoung Won Bae<sup>7</sup>, Youngtae Bae<sup>8</sup>, Jong-Min Baek<sup>9</sup>, Byung Joo Chae<sup>10</sup>, Il Sung Chang<sup>11</sup>, Myungchul Chang<sup>12</sup>, Young Woo Chang<sup>13</sup>, Se-Heon Cho<sup>14</sup>, Young Up Cho<sup>15</sup>, Jihyoung Cho<sup>16</sup>, Min Jung Cho<sup>17</sup>, Dong Hui Cho<sup>18</sup>, Young Jin Choi<sup>19</sup>, Myung Sook Choi<sup>20</sup>, Sangyong Choi<sup>21</sup>, Suyun Choi<sup>22</sup>, Min-Young Choi<sup>23</sup>, Jae Hyuck Choi<sup>24</sup>, Hyunjung Choi<sup>25</sup>, Eun Hye Choi<sup>26</sup>, Seunghye Choi<sup>27</sup>, Un Jong Choi<sup>28</sup>, Jeung Eun Choi<sup>29</sup>, Young Soon Chun<sup>30</sup>, Bong Wha Chung<sup>31</sup>, Min Sung Chung<sup>32</sup>, Ilyong Chung<sup>33</sup>, Yong Hwa Eom<sup>10</sup>, Young A Eun<sup>34</sup>, Geumhee Gwak<sup>35</sup>, Kyu Dam Han<sup>26</sup>, Sehwan Han<sup>36</sup>, Sang-Ah Han<sup>37</sup>, Wonshik Han<sup>38</sup>, Airi Han<sup>39</sup>, Ho Hur<sup>40</sup>, Ki-Tae Hwang<sup>41</sup>, Jae-Hoon Jang<sup>37</sup>, Changwan Jeon<sup>42</sup>, Young San Jeon<sup>43</sup>, Ye Won Jeon<sup>44</sup>, Joon Jeong<sup>6</sup>, Eui Chul Jeong<sup>45</sup>, Young Ju Jeong<sup>46</sup>, Si-Youl Jun<sup>47</sup>, So-Youn Jung<sup>4</sup>, Seung Pil Jung<sup>7</sup>, Younglae Jung<sup>8</sup>, Sang Seol Jung<sup>10</sup>, Jiwoong Jung<sup>18</sup>, Youn Seung Jung<sup>20</sup>, Yong Sik Jung<sup>36</sup>, Sung Hoo Jung<sup>48</sup>, Jaehag Jung<sup>49</sup>, Eun Jung Jung<sup>50</sup>, Jung Pa Jung<sup>51</sup>, Jin Hyang Jung<sup>52</sup>, Yong Hwan Jung<sup>53</sup>, Sun Mi Kang<sup>2</sup>, Sung Soo Kang<sup>2</sup>, Han-Sung Kang<sup>4</sup>, Taewoo Kang<sup>8</sup>, Sun Hee Kang<sup>16</sup>, Su Hwan Kang<sup>29</sup>, Sang Yull Kang<sup>48</sup>, Yoon Jung Kang<sup>49</sup>, Eunyoungh Kang<sup>54</sup>, Hee Jeong Kim<sup>5</sup>, Ji Sun Kim<sup>5</sup>, Je-Ryong Kim<sup>11</sup>, Hwan Soo Kim<sup>13</sup>, Sei Joong Kim<sup>15</sup>, Hye Gyong Kim<sup>20</sup>, Wansung Kim<sup>25</sup>, Cheol Seung Kim<sup>26</sup>, Eunyoungh Kim<sup>33</sup>, Jongjin Kim<sup>41</sup>, Han-Suk Kim<sup>41</sup>, Seon Kwang Kim<sup>48</sup>, Ju-Yeon Kim<sup>50</sup>, Wan Wook Kim<sup>52</sup>, Eun-Kyu Kim<sup>54</sup>, Jun Hyun Kim<sup>55</sup>, Seung Ki Kim<sup>56</sup>, Kweon Cheon Kim<sup>57</sup>, Yoo Seok Kim<sup>57</sup>, Dongwon Kim<sup>58</sup>, Sung-Won Kim<sup>58</sup>, Lee Su Kim<sup>59</sup>, Jun Ho Kim<sup>59</sup>, Tae Hyun Kim<sup>60</sup>, Woon-won Kim<sup>61</sup>, Jae Il Kim<sup>62</sup>, Hyun-Ah Kim<sup>63</sup>, Doyil Kim<sup>64</sup>, Sang Won Kim<sup>65</sup>, Sung Cheol Kim<sup>65</sup>, Hyun-Yul Kim<sup>66</sup>, In Cheol Kim<sup>67</sup>, Sung Yong Kim<sup>68</sup>, Seok Won Kim<sup>69</sup>, Sang Youn Kim<sup>70</sup>, Bong Kyun Kim<sup>71</sup>, Yong-Seok Kim<sup>72</sup>, Jeong-Soo Kim<sup>72</sup>, Ku Sang Kim<sup>73</sup>, Seung Il Kim<sup>74</sup>, Sung Sang Ko<sup>2</sup>, Beom Seok Ko<sup>5</sup>, Eunyoungh Ko<sup>41</sup>, Jincheul Ko<sup>75</sup>, Byung Kyun Ko<sup>76</sup>, Jonghyun Koh<sup>77</sup>, Jin Ho Kwak<sup>3</sup>, Beom Seok Kwak<sup>78</sup>, Jungnam Kwon<sup>79</sup>, Hae Kyung Lee<sup>2</sup>, Seeyoun Lee<sup>4</sup>, Eun Sook Lee<sup>4</sup>, Sae Byul Lee<sup>5</sup>, Jong Won Lee<sup>5</sup>, Hak Woo Lee<sup>6</sup>, Seokwon Lee<sup>8</sup>, Jeeyeon Lee<sup>8</sup>, Jin sun Lee<sup>11</sup>, Chang Hyun Lee<sup>24</sup>, Kwang Man Lee<sup>28</sup>, Soo Jung Lee<sup>29</sup>, Dong Seok Lee<sup>34</sup>, Jun Hyuk Lee<sup>34</sup>, Jun Woo Lee<sup>38</sup>, Jeonghui Lee<sup>51</sup>, Kyungsik Lee<sup>56</sup>, Kyungpo Lee<sup>56</sup>, Seungah Lee<sup>56</sup>, Namseop Lee<sup>58</sup>, Younok Lee<sup>59</sup>, Jung Sun Lee<sup>61</sup>, Wonhung Lee<sup>64</sup>, Hak Min Lee<sup>64</sup>, Suck Jae Lee<sup>65</sup>, Sang Hyup Lee<sup>66</sup>, Kyoung Chun Lee<sup>67</sup>, Hyouk Jin Lee<sup>67</sup>, Se Kyung Lee<sup>69</sup>, Jeong Eon Lee<sup>69</sup>, Jin A Lee<sup>71</sup>, Hye Yoon Lee<sup>80</sup>, Jae Bok Lee<sup>81</sup>, Min Hyuk Lee<sup>82</sup>, Jihyoun Lee<sup>82</sup>, Cheol Wan Lim<sup>1</sup>, Woosung Lim<sup>83</sup>, Junwon Min<sup>12</sup>, Younki Min<sup>84</sup>, Hyeong-Gon Moon<sup>38</sup>, Nanmo Moon<sup>42</sup>,

Byung-In Moon<sup>83</sup>, Sang Eun Nam<sup>17</sup>, Seok Jin Nam<sup>69</sup>, Soon Young Nam<sup>85</sup>, Dong-Young Noh<sup>38</sup>, Woo Chul Noh<sup>63</sup>, Se-Jeong Oh<sup>86</sup>, Hyun-June Paik<sup>69</sup>, Nam-Sun Paik<sup>83</sup>, Jong Tae Park<sup>6</sup>, Shin Young Park<sup>15</sup>, Kyung Sik Park<sup>17</sup>, Young Sam Park<sup>26</sup>, Heungkyu Park<sup>30</sup>, Inseok Park<sup>35</sup>, Soon-Tae Park<sup>45</sup>, Sung Hwan Park<sup>46</sup>, Ho Yong Park<sup>52</sup>, Sungmin Park<sup>69</sup>, Byeong-Woo Park<sup>74</sup>, Seho Park<sup>74</sup>, Hyung Seok Park<sup>74</sup>, Hai Lin Park<sup>87</sup>, Min Ho Park<sup>88</sup>, Hee Boong Park<sup>89</sup>, Yong Lai Park<sup>90</sup>, Chan Heun Park<sup>90</sup>, Woo-Chan Park<sup>91</sup>, Chang Kyun Park<sup>92</sup>, Yu Mi Ra<sup>80</sup>, Jai Min Ryu<sup>69</sup>, Dong Won Ryu<sup>93</sup>, Hyukjae Shin<sup>25</sup>, Jung Hye Shin<sup>34</sup>, Suk Hee Shin<sup>67</sup>, Jae Hoon Sim<sup>17</sup>, Byung Ho Son<sup>5</sup>, Gil Soo Son<sup>13</sup>, Ki Tak Son<sup>34</sup>, Sun-Hyang Son<sup>45</sup>, Byung Joo Song<sup>10</sup>, Young Jin Song<sup>21</sup>, Jeong-Yoon Song<sup>37</sup>, Yu Jeong Song<sup>45</sup>, Young Jin Suh<sup>44</sup>, Woo Young Sun<sup>71</sup>, Tae Wan Won<sup>28</sup>, Sang Uk Woo<sup>81</sup>, Ban Seok Yang<sup>6</sup>, Jung Hyun Yang<sup>17</sup>, Onvox Yi<sup>42</sup>, Ha Woo Yi<sup>69</sup>, Cha Kyo-ung Yom<sup>25</sup>, Young Bum Yoo<sup>17</sup>, Dae Sung Yoon<sup>80</sup>, Jung Han Yoon<sup>88</sup>, Jeeman You<sup>94</sup>, Ji Young You<sup>95</sup>, Byung Ook You<sup>96</sup>, Hyun Jo Youn<sup>48</sup>, Jong-Han Yu<sup>69</sup>, Min Young Yun<sup>64</sup>, Tae IL Yun<sup>97</sup>, Chang Gyum Yun<sup>98</sup>.

### **Affiliations of Authors/the KBCS Consortium:**

<sup>5</sup>Asan Medical Center, <sup>6</sup>Yonsei University Gangnam Severance Hospital, <sup>7</sup>Korea University Anam Hospital, <sup>8</sup>Pusan National University Hospital, <sup>9</sup>The Catholic University of Korea, Bucheon St. Mary's Hospital, <sup>10</sup>The Catholic University of Korea, Seoul St. Mary's Hospital, <sup>11</sup>Chungnam National University Hospital, <sup>12</sup>Dankook University Hospital, <sup>13</sup>Korea University Ansan Hospital, <sup>14</sup>Dong-A University Hospital, <sup>15</sup>Inha University Hospital, <sup>16</sup>Keimyung University Dongsan Medical Center, <sup>17</sup>Konkuk University Medical Center, <sup>18</sup>Seoul Medical Center, <sup>19</sup>Chungbuk National University Hospital, <sup>20</sup>Gwangju Hyundai Hospital, <sup>21</sup>Gwangmyeong Sung Ae Hospital, <sup>22</sup>Hallym University Kandong Sacred Heart Hospital, <sup>23</sup>Hanyang University Guri Hospital, <sup>24</sup>Jeju National University Hospital, <sup>25</sup>Myung Ji Hospital, <sup>26</sup>Presbyterian Medical Center, <sup>27</sup>The Catholic University of Korea, St. Paul's Hospital, <sup>28</sup>Wonkwang University Hospital, <sup>29</sup>Yeungnam University Medical Center, <sup>30</sup>Gachon University Gil Hospital, <sup>31</sup>Hallym University Gangnam Sacred Heart Hospital, <sup>32</sup>Hanyang University Hospital, <sup>33</sup>National Medical Center, <sup>34</sup>Bunhong Hospital, <sup>35</sup>Inje University Sanggye Paik Hospital, <sup>36</sup>Ajou University Hospital, <sup>37</sup>Kyung Hee University Hospital at Gangdong, <sup>38</sup>Seoul National University Hospital, <sup>39</sup>Yonsei University Wonju Severance Christian Hospital, <sup>40</sup>National Health Insurance Service Ilsan Hospital, <sup>41</sup>Seoul National University Boramae Medical Center, <sup>42</sup>Donagham Institute of Radiological and Medical Sciences, <sup>43</sup>Goo Hospital, <sup>44</sup>The Catholic University of Korea, St. Vincent's Hospital, <sup>45</sup>Chinju Jeil Hospital, <sup>46</sup>Daegu Catholic University Medical Center, <sup>47</sup>Sungkyunkwan University Sam-

sung Changwon Hospital, <sup>48</sup>Chonbuk National University Hospital, <sup>49</sup>Eulji University Hospital, <sup>50</sup>Gyeongsang National University Hospital, <sup>51</sup>JPJ Breast and Thyroid Clinic, <sup>52</sup>Kyungpook National University Medical Center, <sup>53</sup>Sahmyook Seoul Hospital, <sup>54</sup>Seoul National University Bundang Hospital, <sup>55</sup>Busan St. Mary's Hospital, <sup>56</sup>CHA Bundang Medical Center, CHA University, <sup>57</sup>Chosun University Hospital, <sup>58</sup>Daerim St. Mary's Hospital, <sup>59</sup>Hallym University Sacred Heart Hospital, <sup>60</sup>Inje University Busan Paik Hospital, <sup>61</sup>Inje University Haeundae Paik Hospital, <sup>62</sup>Inje University Ilsan Paik Hospital, <sup>63</sup>Korea Cancer Center Hospital, <sup>64</sup>Mizmedi Hospital, <sup>65</sup>Mother's Hospital, <sup>66</sup>Pusan National University Yangsan Hospital, <sup>67</sup>Saegyaero Hospital, <sup>68</sup>Soonchunhyang University Cheonan Hospital, <sup>69</sup>Sungkyunkwan University Samsung Medical Center, <sup>70</sup>Taegu Fatima Hospital, <sup>71</sup>The Catholic University of Korea, Daejeon St. Mary's Hospital, <sup>72</sup>The Catholic University of Korea, Uijeongu St. Mary's Hospital, <sup>73</sup>Ulsan City Hospital, <sup>74</sup>Yon-

sei University Severance Hospital, <sup>75</sup>Seoul Sungae Hospital, <sup>76</sup>Ulsan University Hospital, <sup>77</sup>Cheongju St. Mary's Hospital, <sup>78</sup>Dongguk University Ilsan Hospital, <sup>79</sup>Wonkwang University Sanbon Hospital, <sup>80</sup>Konyang University Hospital, <sup>81</sup>Korea University Guro Hospital, <sup>82</sup>Soonchunhyang University Seoul Hospital, <sup>83</sup>Ewha Womans University Mokdong Hospital, <sup>84</sup>Cheju Halla General Hospital, <sup>85</sup>CHA Gumi Medical Center, CHA University, <sup>86</sup>The Catholic University of Korea, Incheon St. Mary's Hospital, <sup>87</sup>CHA Gangnam Medical Center, CHA University, <sup>88</sup>Hwasun Chonnam National University Hospital, <sup>89</sup>Park Surgical Clinic, <sup>90</sup>Sungkyunkwan University Kangbuk Samsung Hospital, <sup>91</sup>The Catholic University of Korea, Yeouido St. Mary's Hospital, <sup>92</sup>VHS Medical Center, <sup>93</sup>Kosin University Gospel Hospital, <sup>94</sup>Daejeon Sun Hospital, <sup>95</sup>Eulji General Hospital, <sup>96</sup>Gyeonggi Provincial Medical Center, <sup>97</sup>21 Century Surgical Clinic, <sup>98</sup>Hanmaeum General Surgery Clinic.
